# Supplementary figures and images for: ACT como alternativa terapéutica a pacientes que no responden a tratamientos tradicionales: un estudio de caso
Source: Royal Society of Chemistry journal article supplement (doi:10.1039/d1cp02258j), 2002-01-01

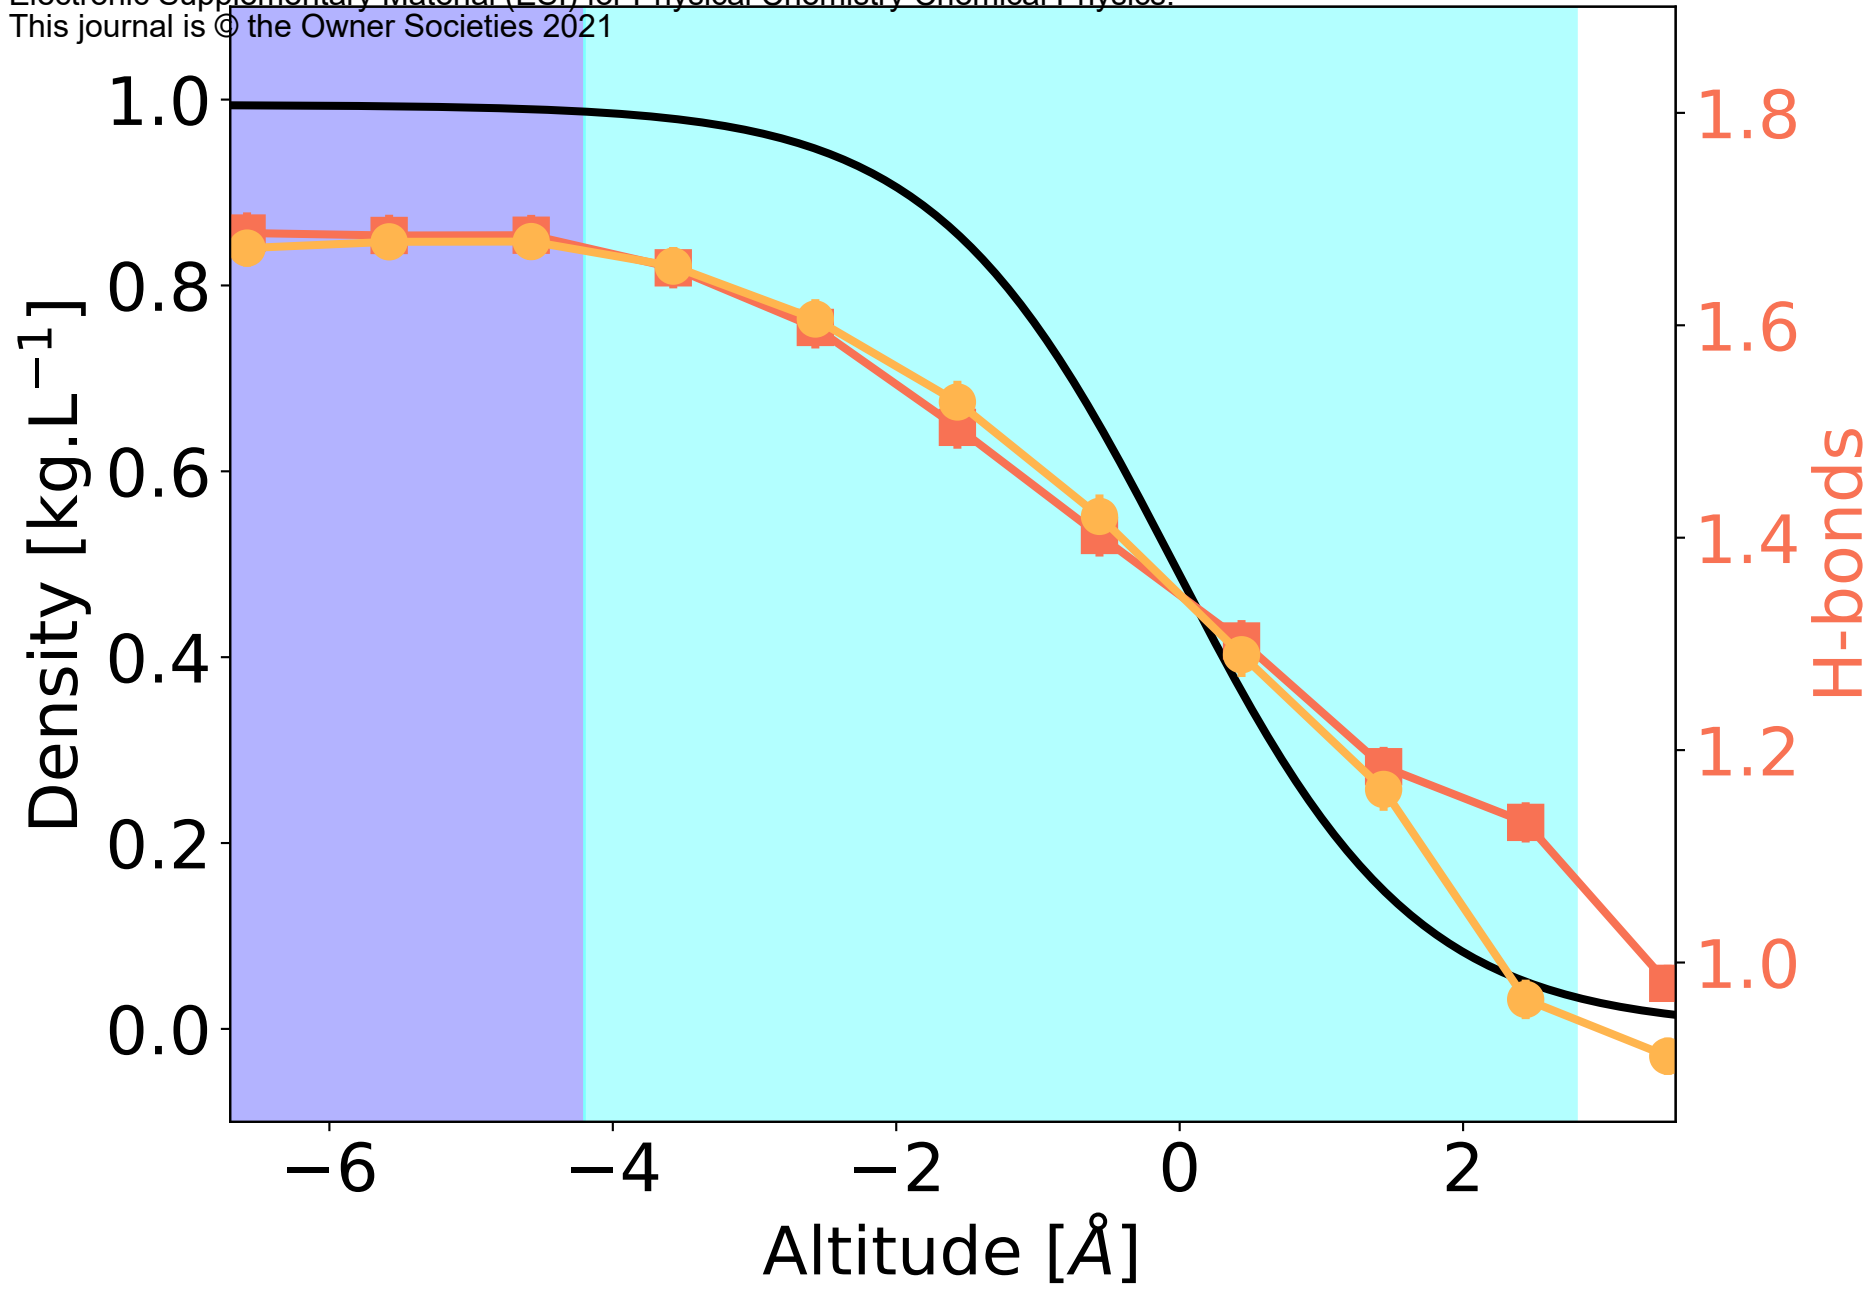

Supplement: d1cp02258j10.pdf [file d1cp02258j10.pdf]

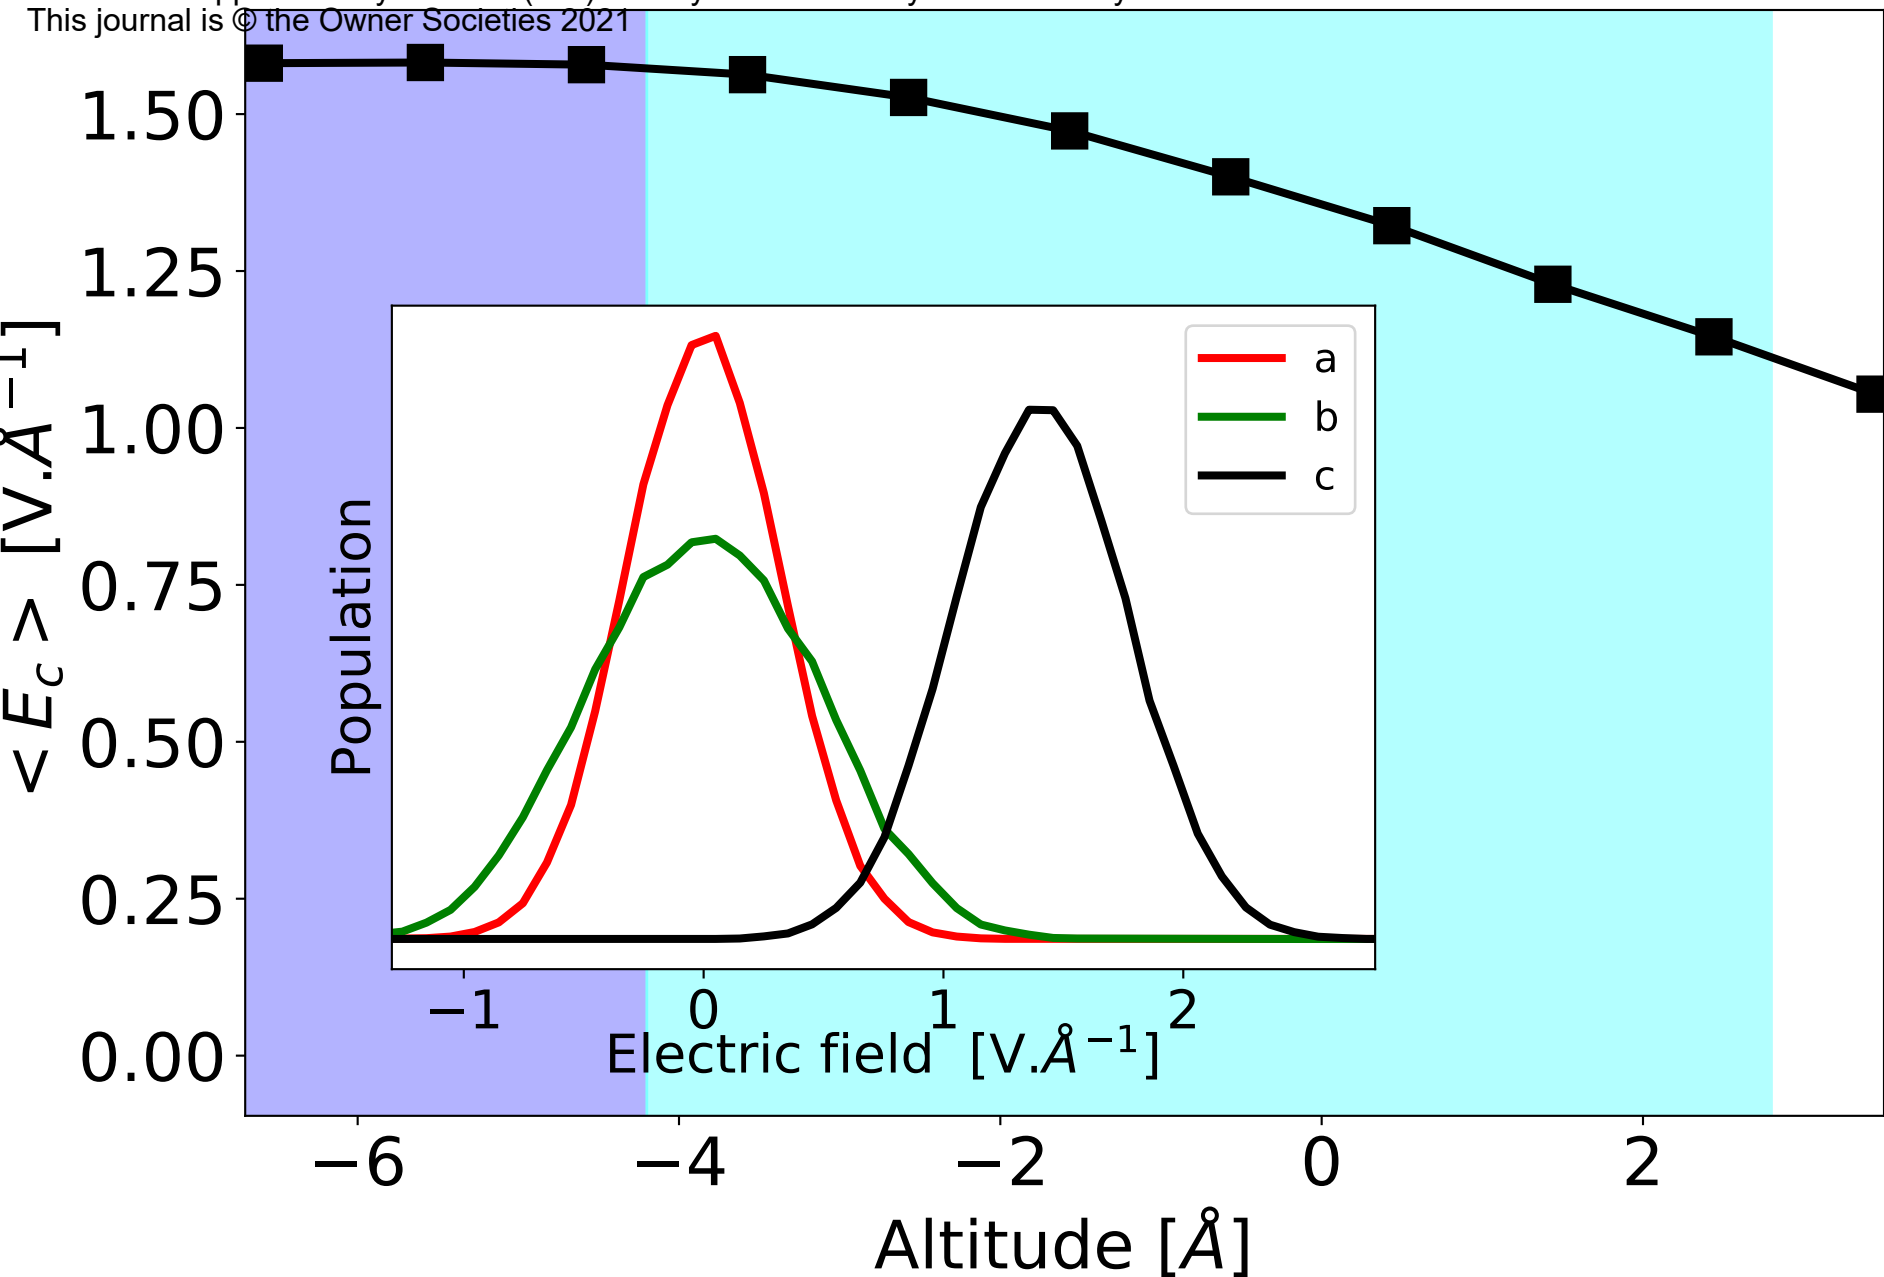

Supplement: d1cp02258j11.pdf [file d1cp02258j11.pdf]

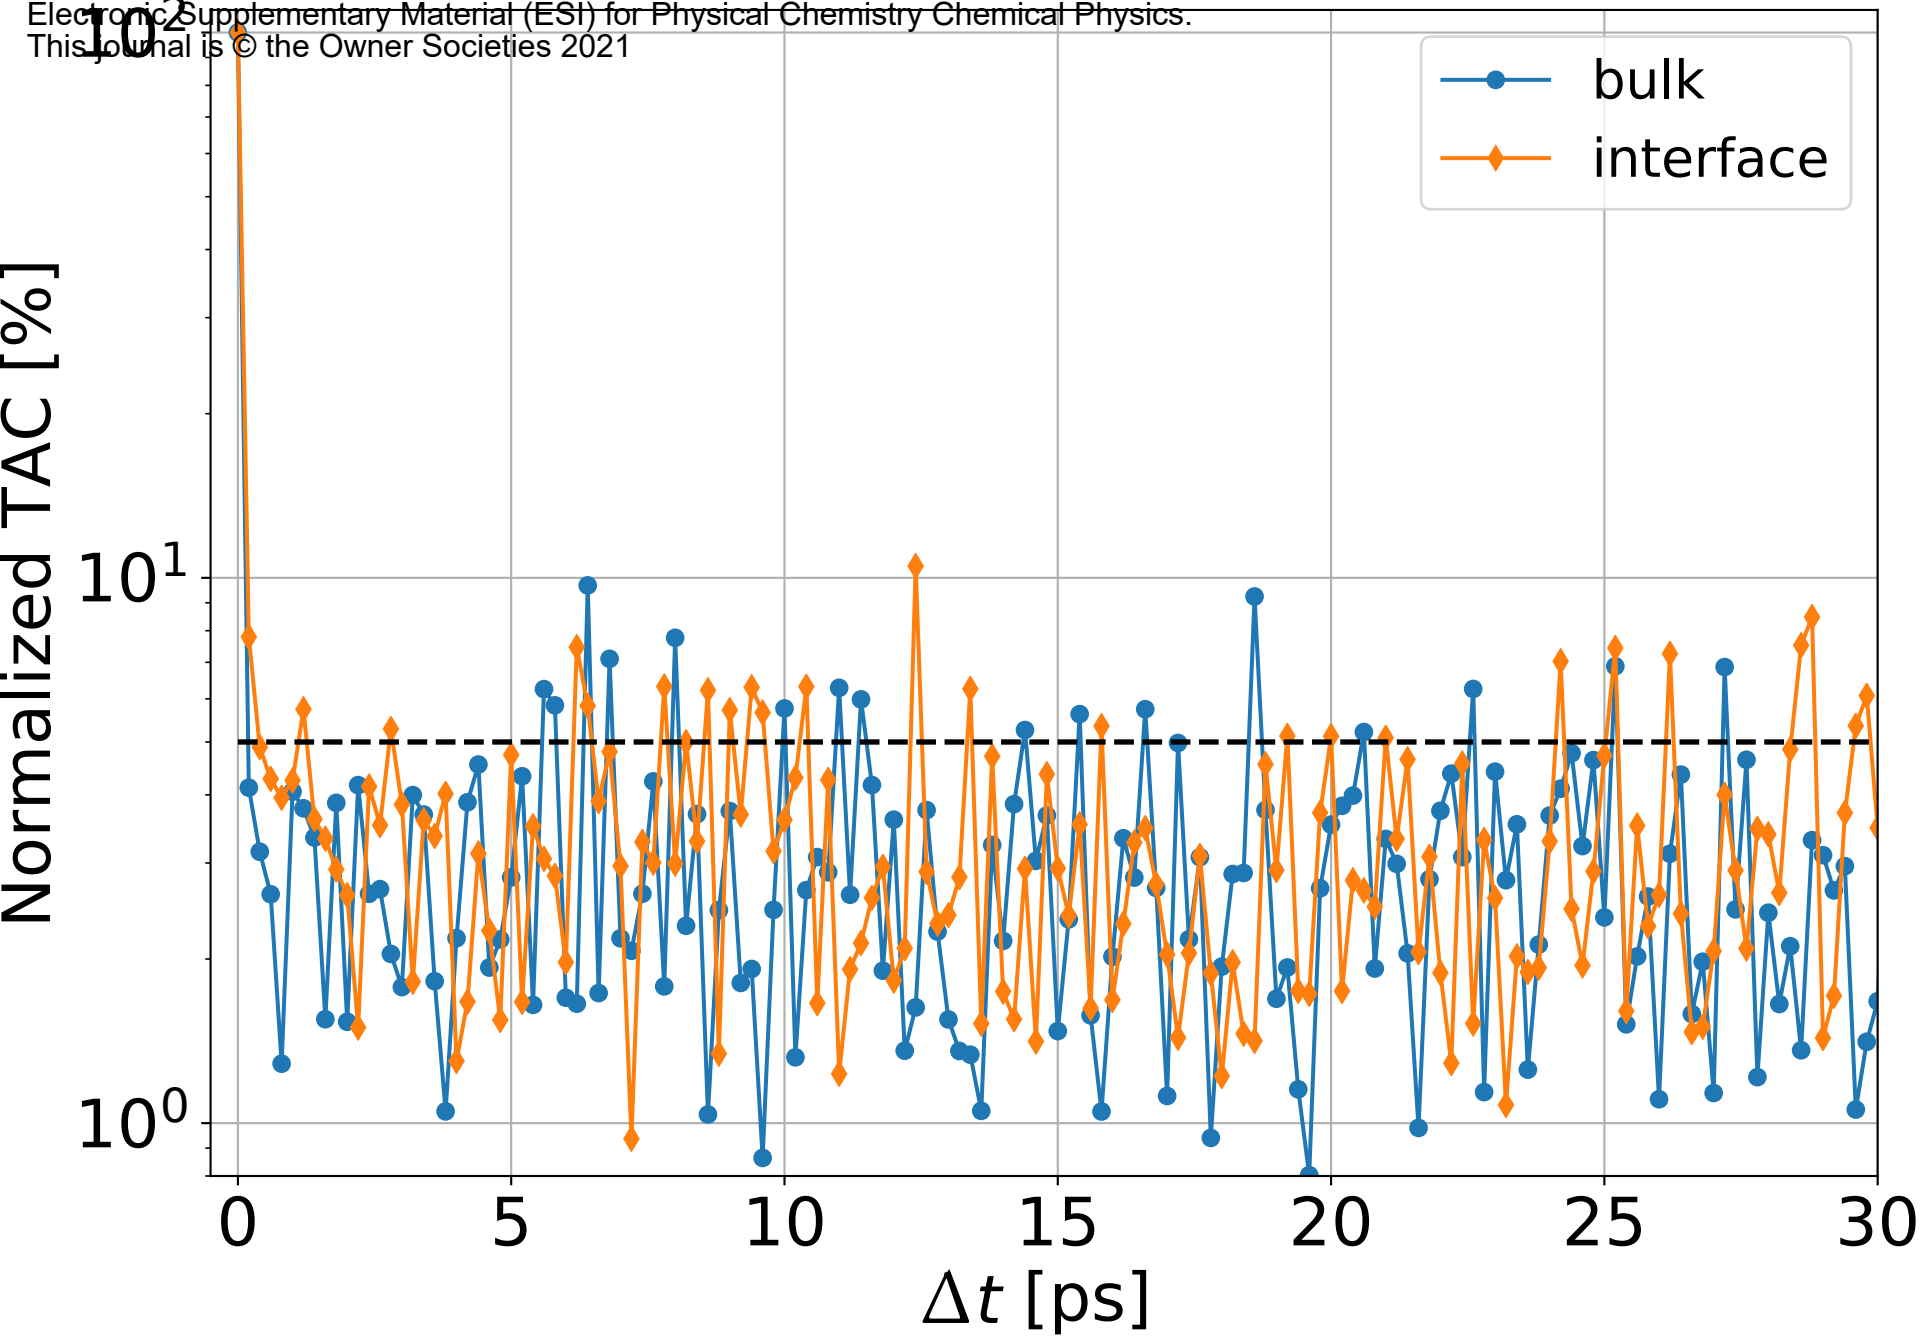

Supplement: d1cp02258j2.pdf [file d1cp02258j2.pdf]

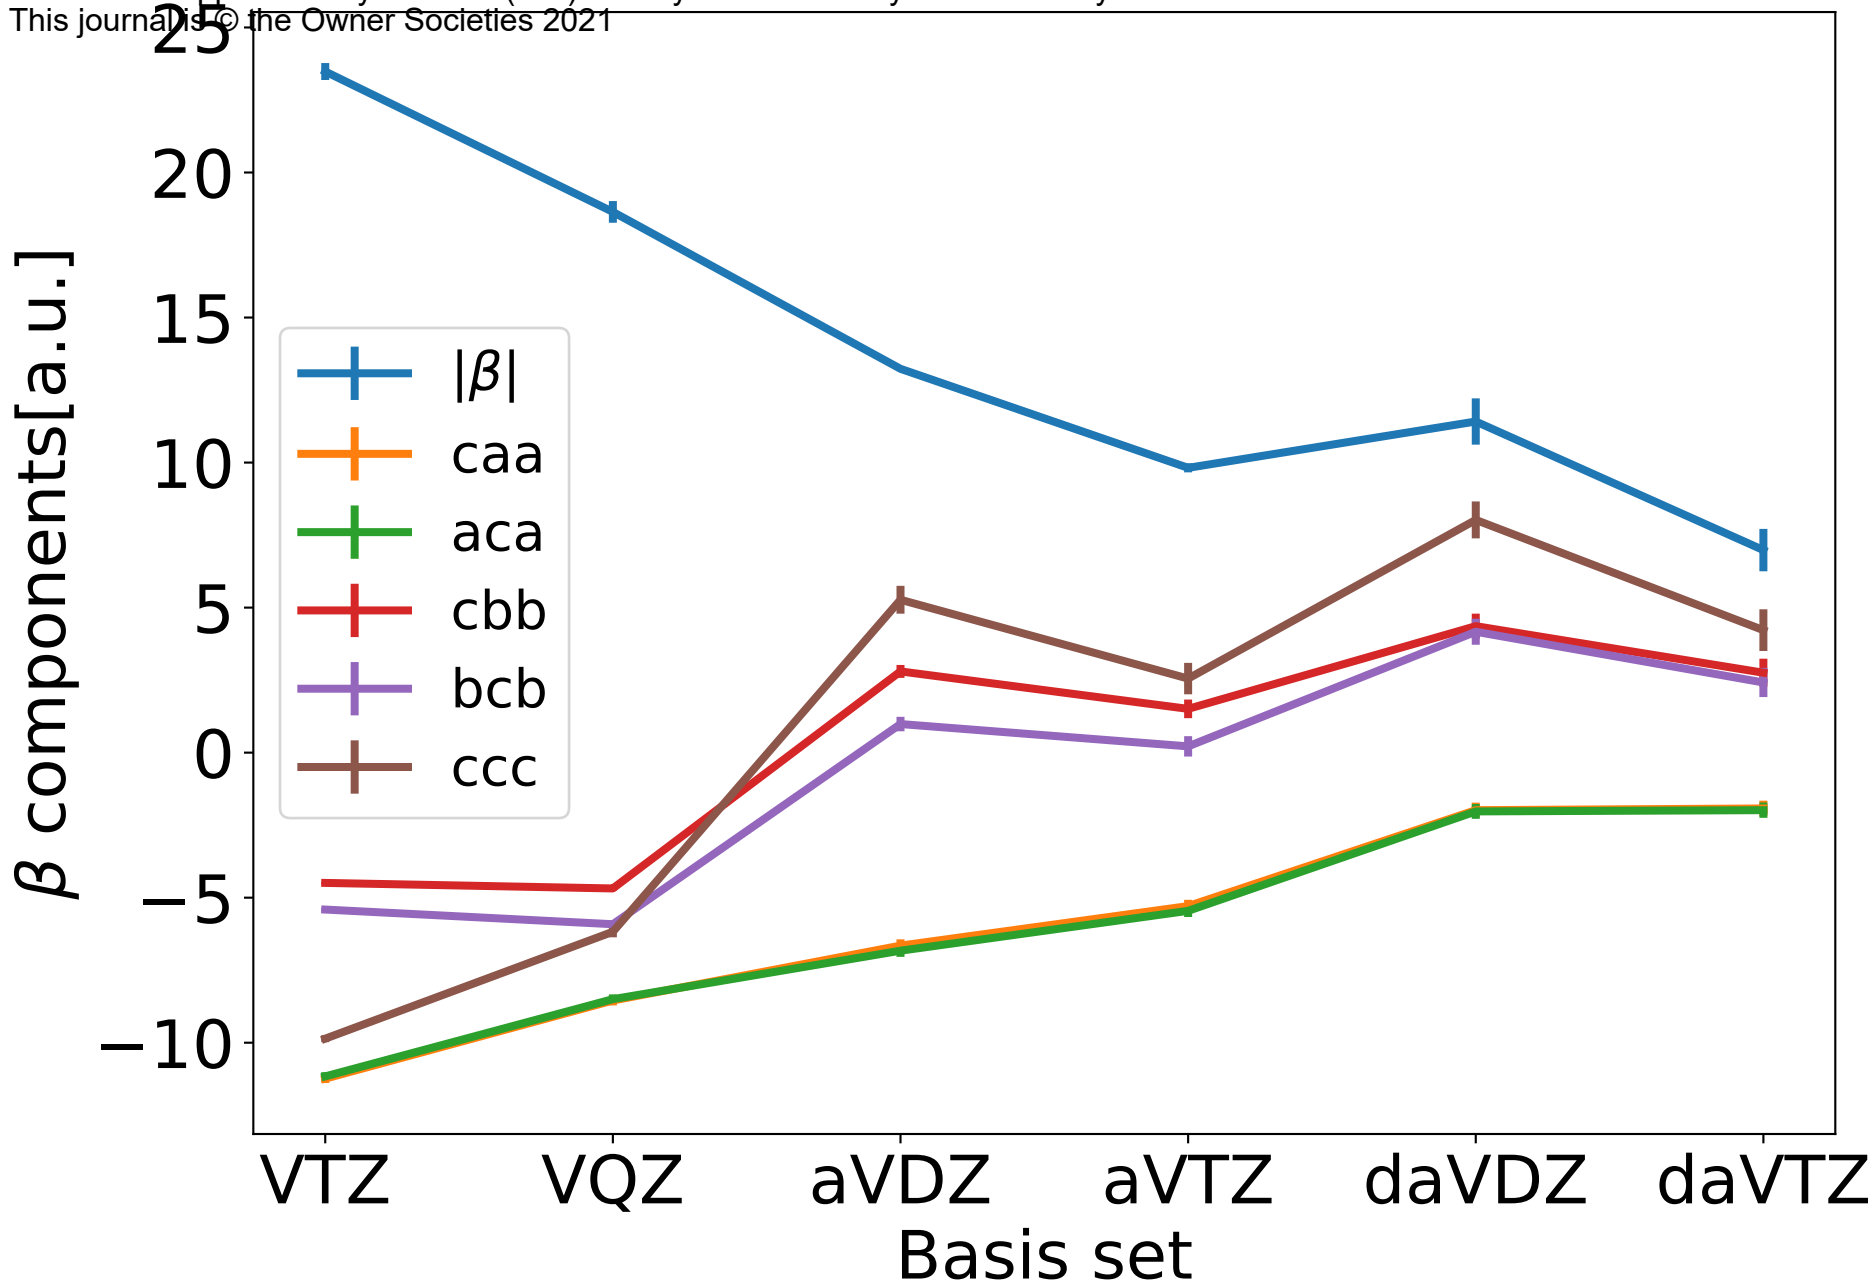

Supplement: d1cp02258j3.pdf [file d1cp02258j3.pdf]

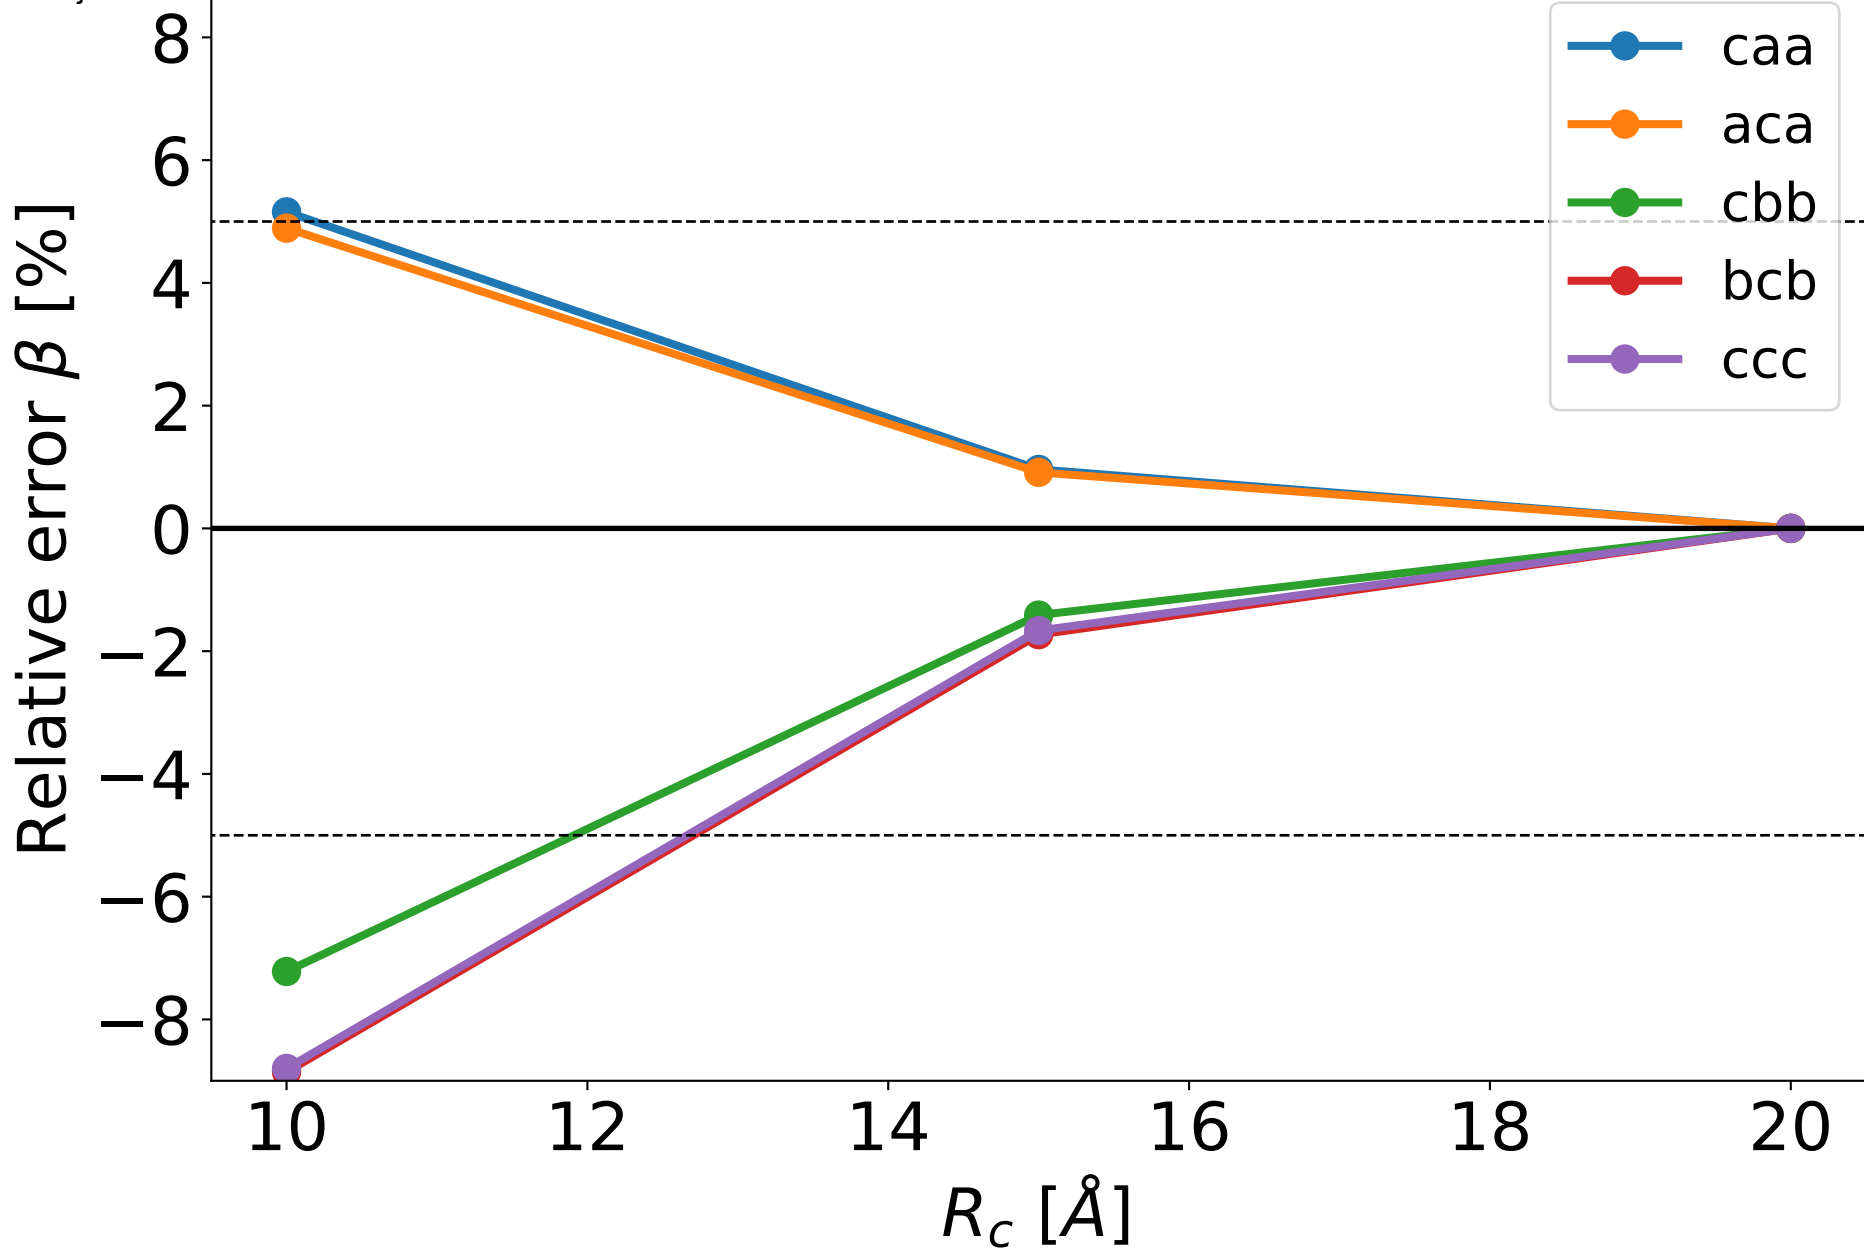

Supplement: d1cp02258j4.pdf [file d1cp02258j4.pdf]

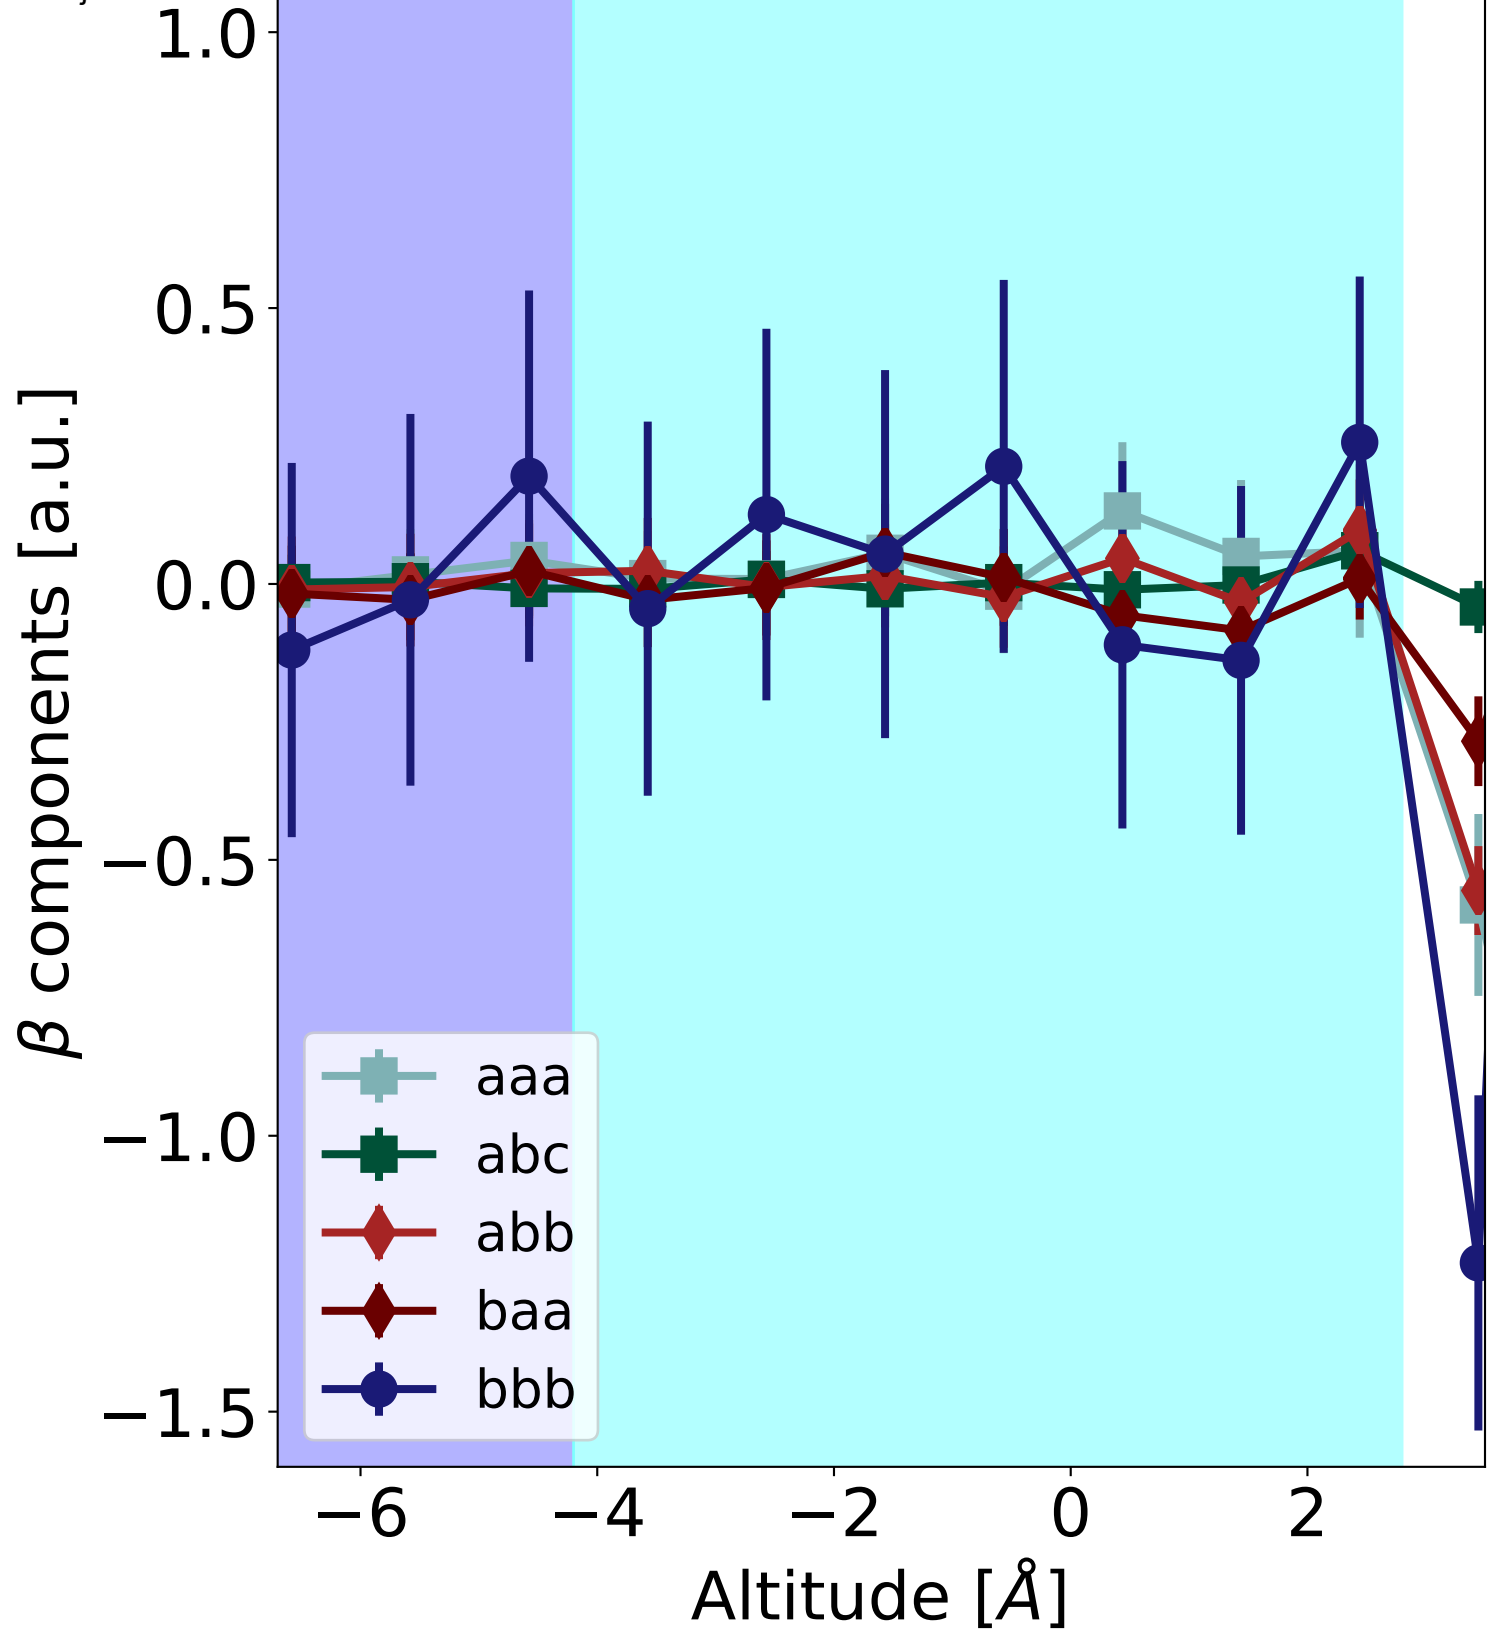

Supplement: d1cp02258j5.pdf [file d1cp02258j5.pdf]

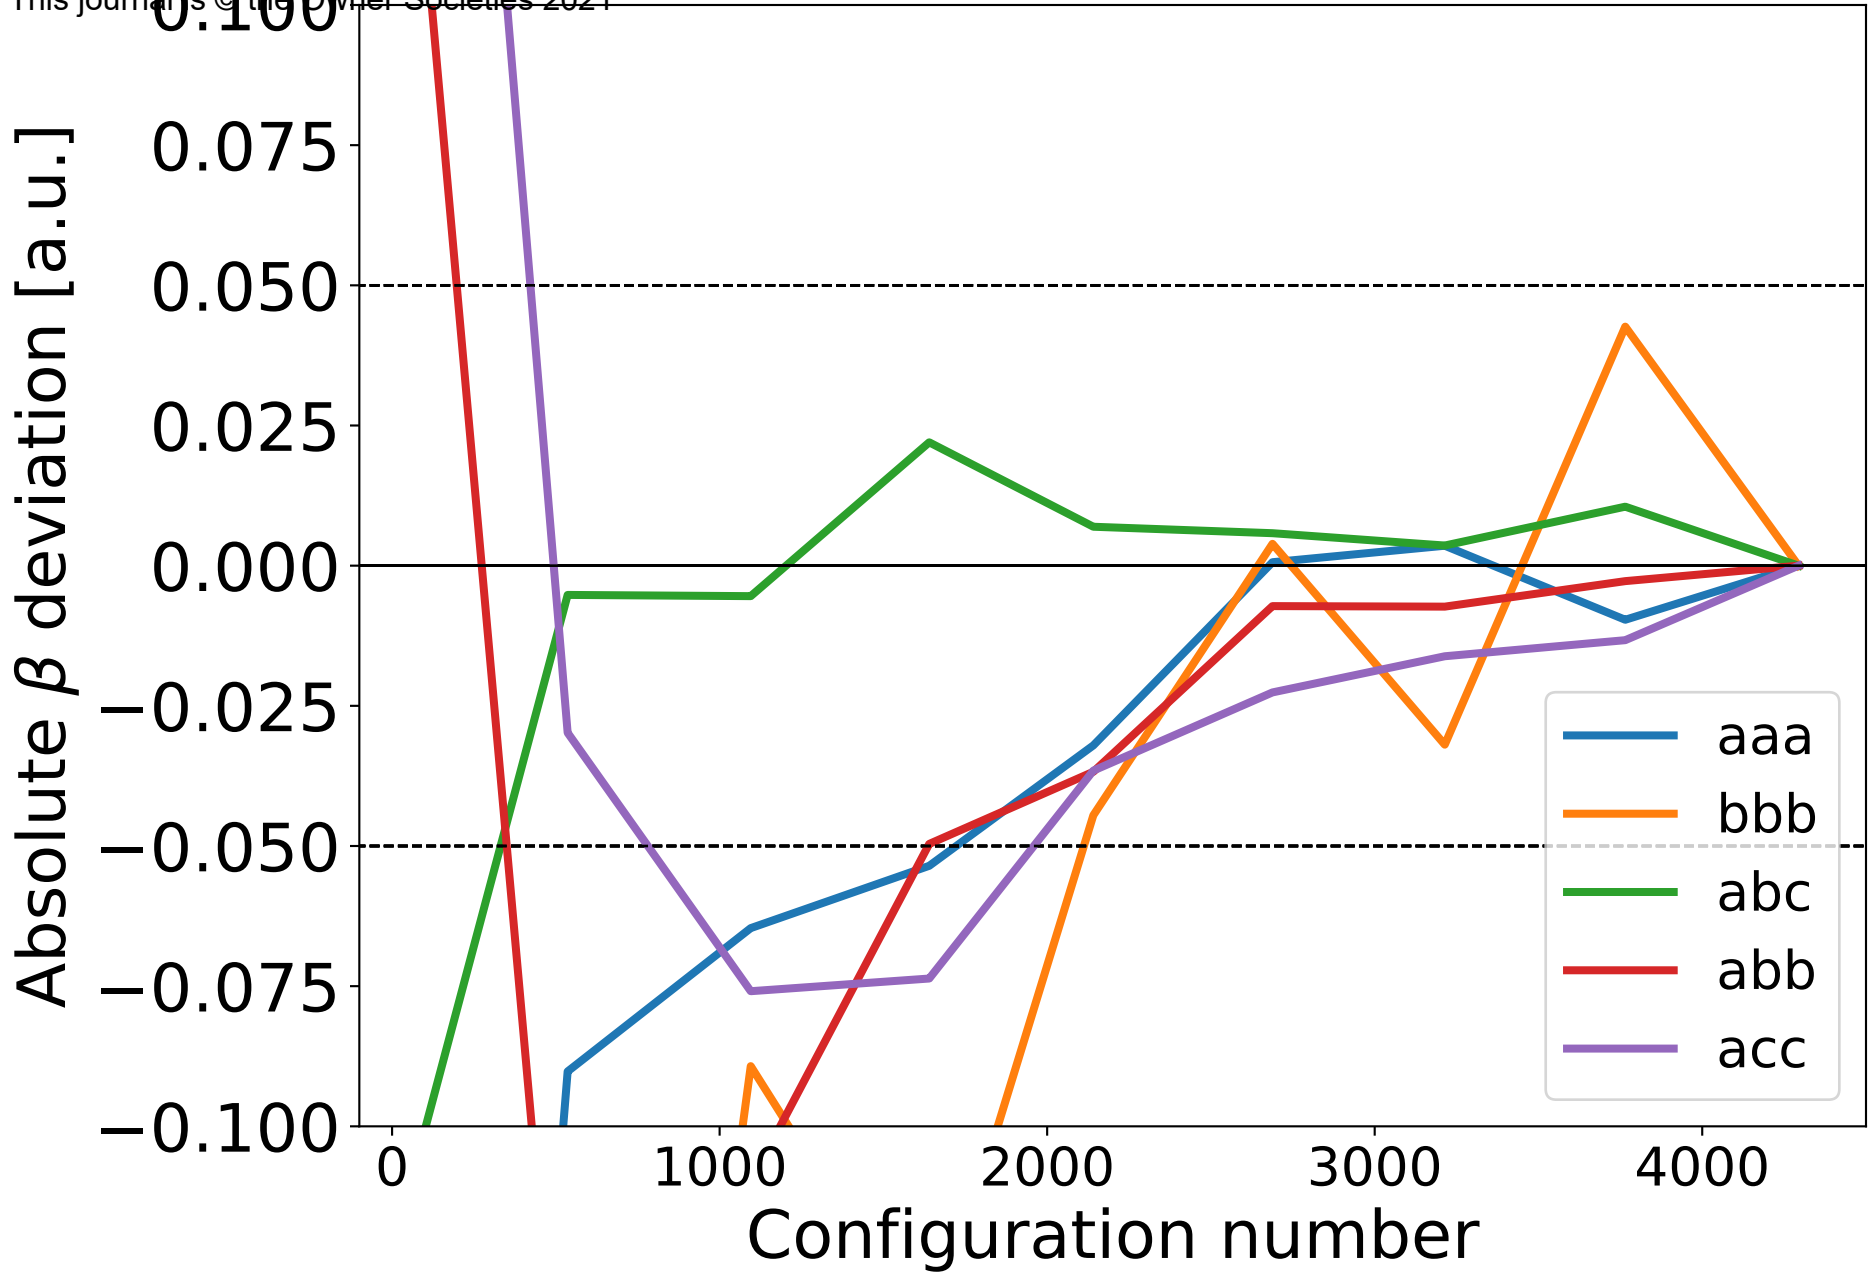

Supplement: d1cp02258j6.pdf [file d1cp02258j6.pdf]

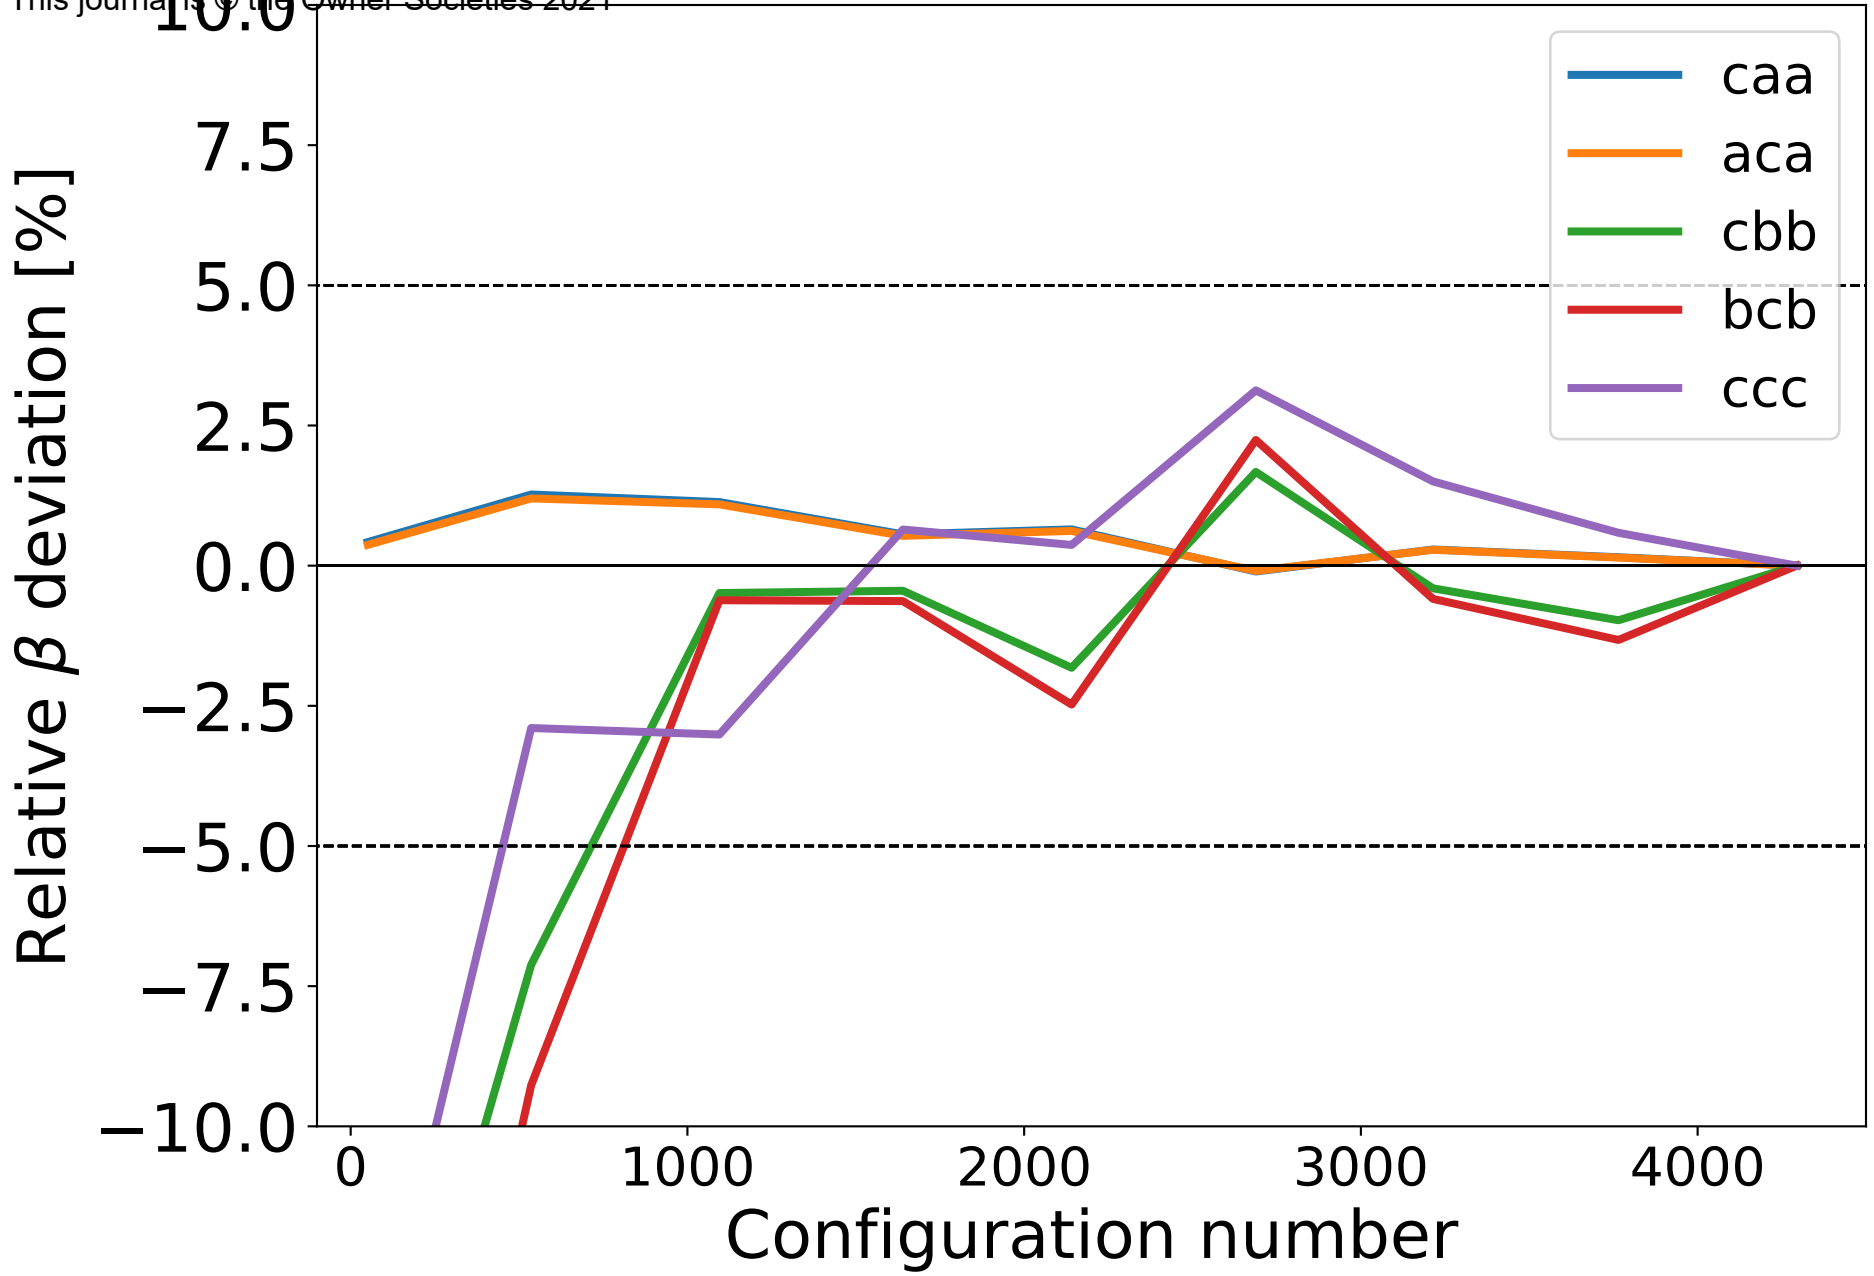

Supplement: d1cp02258j7.pdf [file d1cp02258j7.pdf]

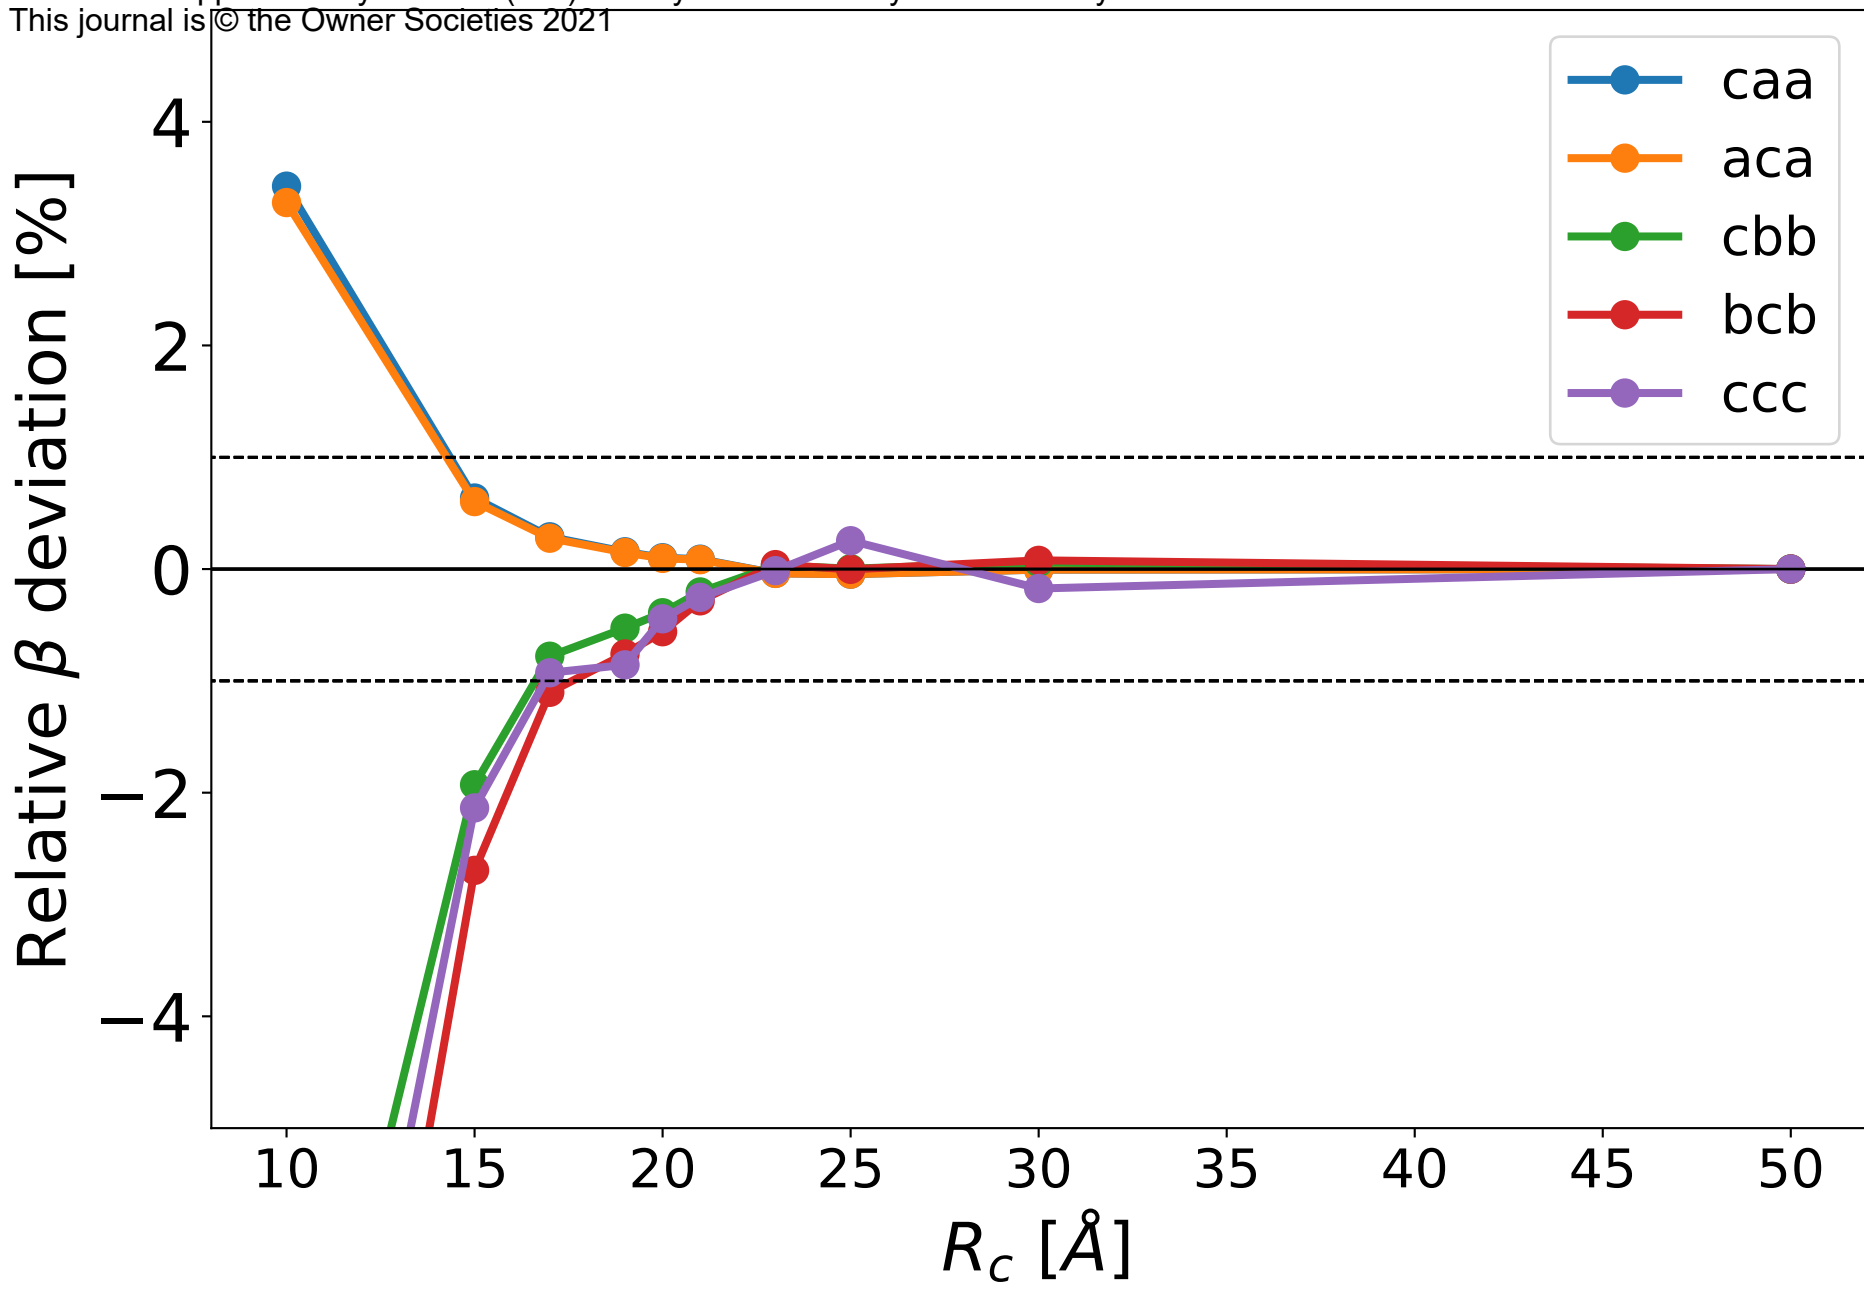

Supplement: d1cp02258j8.pdf [file d1cp02258j8.pdf]

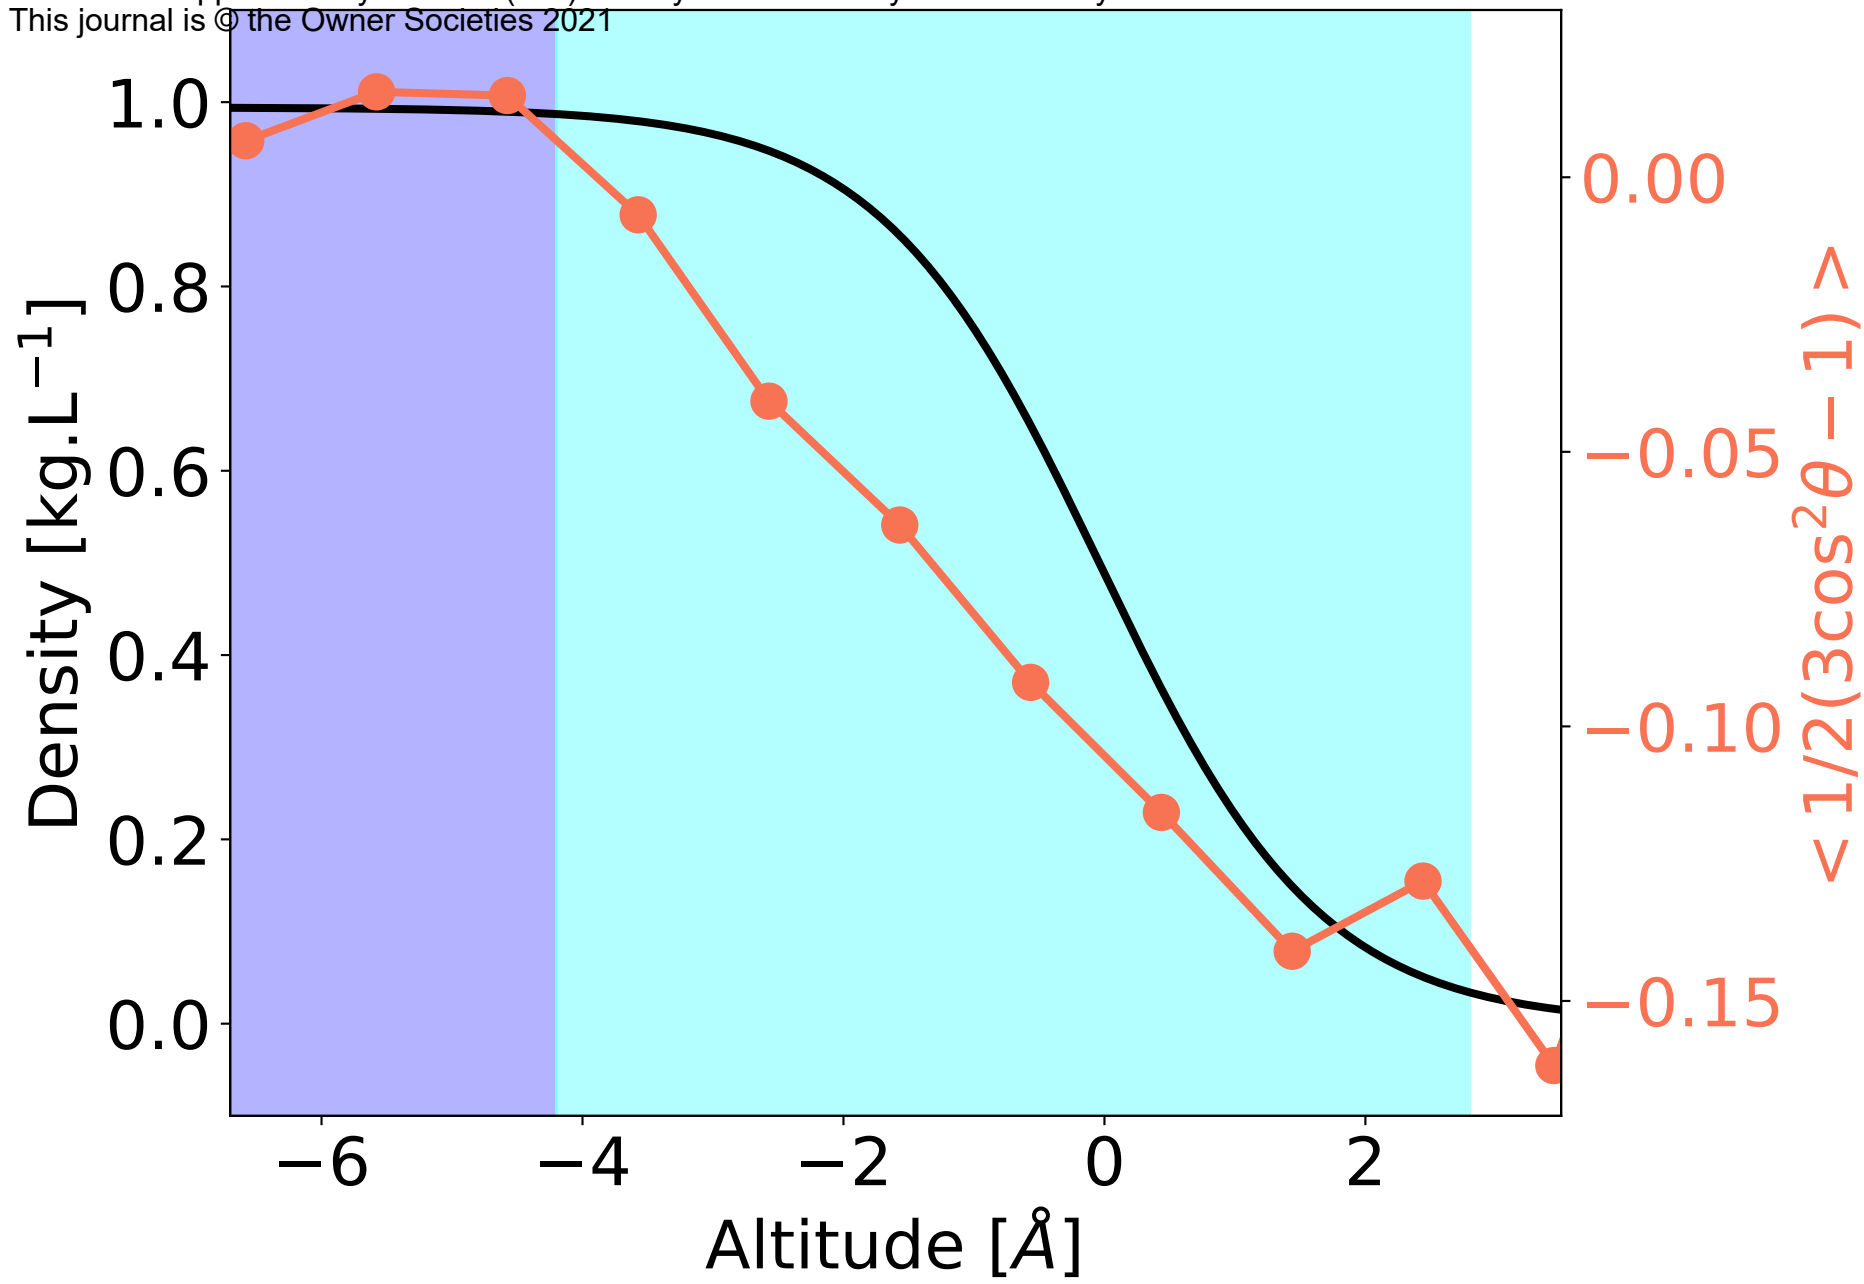

Supplement: d1cp02258j9.pdf [file d1cp02258j9.pdf]
